# Supplementary material
Source: PubMed Central journal article supplement (PMC9579897)
Supplement: mmc2.pdf [file mmc2.pdf]

## COVID-19 SEMICYUC WORKING GROUP INVESTIGATORS

### Andalucía:

**UCI Hospital Universitario Virgen de Valme (Sevilla):** Ana Loza, Angel Hurtado, Isabel Gutiérrez Morales, Lola García Ezpeleta; **UCI Hospital Quirón (Huelva):** Diego Matallana Zapata; **UCI Hospital Universitario Puerto Real (Cádiz):** Isabel Díaz Torres, Sonia Ibañez Cuadros, María Recuerda Nuñez, María Luz Carmona Pérez, Jorge Gómez Ramos, Alba Villares Casas; **UCI Hospital Universitario Virgen de la Macarena (Sevilla):** María Luisa Cantón, José Javier González Contreras, Helena Pérez Chomón, Nerissa Alvarez Chicote, Alberto Sousa González; **UCI Hospital Universitario Reina Sofía (Córdoba):** María De Alba Aparicio, Juan Carlos Pozo Laderas; **UCI Hospital Universitario de Jerez (Jerez de la Frontera):** Angel Estella, Sara Moreno Cano. **UCI Hospital Infanta Elena (Huelva):** Diego Matallana Zapata; **UCI Hospital San Juan de Dios del Aljarafe (Sevilla):** José Luís García Garmendia; **UCI Hospital Universitario Virgen de las Nieves(Granada):** Juan F. Machado Casas; **UCI Hospital Universitario Clínico San Cecilio(Granada):** María Eugenia Yuste; **UCI Hospital Universitario Virgen del Rocío (Sevilla):** Rosario Amaya; **UCI Hospital Universitario Virgen de la Victoria (Málaga):** M<sup>a</sup> Antonia Estechea; **UCI Hospital Universitario de Jaén(Jaén):** Luis Yaguéz Mateos;

### Aragón:

**UCI Hospital Nuestra Señora de Gracia (Zaragoza):** Ruth Jorge García; **UCI Hospital Clínico Universitario Lozano Blesa (Zaragoza):** Laura Sánchez Montori, Sandra Herrero García, Paula Abanses Moreno, Carlos Mayordomo García. **UCI Hospital General San Jorge(Huesca):** Tomás Mallor Bonet, Paula Omedas Bonafonte, Enric Franquesa Gonzalez, Nestor Bueno Vidales, Paula Ocabo Buil, Carlos Serón Arbeloa; **UCI Hospital Universitario Miguel Servet(Zaragoza):** Isabel Sancho, Pablo Guerrero Ibañez, Pablo Gutierrez, **UCI Hospital Obispo Polanco (Teruel):** María Concepción Valdovinos, Raquel Canto

### Asturias:

**UCI Hospital Universitario San Agustín (Avilés):** Ana Luz Balán Mariño, María José Gutiérrez Fernández, Marta Martín Cuadrado, Belén García Arias; **UCI Hospital Universitario Central de Asturias (Oviedo):** Lorena Forcelledo Espina, Lucía Viña Soria, Lorena Martín Iglesias, Lucía

López Amor, Elisabet Fernández Rey, Emilio García Prieto. **UCI Hospital Cabueñes (Gijón):**

Débora Fernández Ruíz, Carla Martínez González

**Baleares:**

**UCI hospital Universitario Son Llatzer (Palma de Mallorca):** Lorenzo Socias, Marcio Borges-

Sá, María Aranda Pérez, Antonia Socias. **UCI Hospital Quirón Salud Palmaplanas (Palma de**

**Mallorca):** José M<sup>a</sup> Bonell Goytisoló, Inmaculada Alcalde Mayayo, Carlos Corradini, Isabel

Ceniceros, Edwin Rodríguez, Antonio Colom Ferrer, Rosa Vento Rehues; **UCI Hospital**

**Universitario Son Espases (Palma de Mallorca):** Jose Ignacio Ayestarán Rota, Mariana

Andrea Novo Novo, Joaquim Colomina Climent, Albert Figueras Castilla, Tomàs Leal Rullan,

Maria Magdalena Garcias Sastre; **UCI Hospital Comarcal d'Inca(Inca):** Rossana Pérez Senoff;

**UCI Hospital Mateu Orfila (Mao):** Ramón Fernández-Cid Bouza

**Canarias:**

**UCI Complejo Hospitalario Universitario Insular - Materno Infantil (Las Palmas de G.C):**

Juan Carlos Martín González, Carmen Pérez Ortiz, José Luciano Cabrera Santana, Juan José

Cáceres Agra, Domingo González Romero, Ana Casamitjana Ortega; **UCI Hospital General de**

**la Palma (Tenerife):** Luis Alberto Ramos Gómez, Carolina Montelongo Ojeda; **UCI Hospital**

**Universitario Dr. Negrín (Las Palmas de G.C):** Jordi Solé-Violán.

**Cataluña:**

**UCI Hospital Universitari de Tarragona Joan XXIII (Tarragona):** Alejandro Rodríguez, María

Bodí, Gerard Moreno, Sandra Trefler, Laura Claverias, Raquel Carbonell, Erika Esteve,

Montserrat Olona, Xavier Teixidó. **UCI Hospital Universitari Arnau de Vilanova (Lleida):**

Montserrat Vallverdú Vidal, Begoña Balsera Garrido. **UCI Hospital Universitari Vall d'Hebron**

**(Barcelona):** Elisabeth Papiol Gallofré, Raquel Albertos Martell, Rosa Alcaráz Peñarrocha,

Xavier Nuvials Casals, Ricard Ferrer Roca; **UCI Hospital Verge de la Cinta (Tortosa):** Eric

Adrián Mayor Vázquez, Ferrán Roche-Campo, Pablo Concha Martínez, Diego Franch-Llasat; **UCI**

**Hospital del Mar (Barcelona):** Joan Ramón Masclanz , Judith Marín-Corral, Purificación Pérez,

Rosana Muñoz , Clara Vila; **UCI Hospital Mutua de Terrasa (Terrasa):** Francisco Javier

González de Molina, Elisabeth Navas Moya, Josep Trenado; **UCI Hospital Sant Joan (Reus):**

Imma Vallverdú, Eric Castañé; **UCI Hospital Parc Tauli (Sabadell)**: Emili Díaz Santos , Gemma Goma, Edgar Moglia; **UCI Hospital Trias i Pujol (Badalona)**: Fernando Arméstar Rodríguez , Alba Herraiz Ruiz, Pilar Ricart Martí, Regina Roig Pineda, Joan Luque Bailén , Ana Sánchez, Laia Brugué.

#### **Cantabria**

**UCI Hospital Universitario Marqués de Valdecillas (Santander)**: Borja Suberviola

#### **Castilla La Mancha:**

**UCI Hospital Universitario de Guadalajara (Guadalajara)**: Antonio Albaya Moreno, Carlos Marian Crespo. **UCI Hospital Nuestra Señora del Prado (Toledo)**: Carmen Carolina Sena Pérez, Francisca Arbol Linde

#### **Castilla y León:**

**UCI Hospital Virgen de la Concha (Zamora)**: Diana Monge Donaire, Vega Losada Martínez, Nuria Rodrigo Castroviejo, Gerardo Ferrigno, Reyes Beltrán, Carolina Sanmartino, Concepción Tarancón Maján, Alfredo Marcos Gutiérrez; **UCI Complejo Asistencial de Segovia(Segovia)**: Virginia Hidalgo Valverde, Caridad Martín López; **UCI Hospital universitario de Burgos (Burgos)**: Oihane Badallo, María del Valle Ortiz, Rebeca Vara Arlanzón, David Iglesias Posadilla; **UCI Hospital Clínica de Salamanca (Salamanca)**: María Teresa Recio, Juan Carlos Ballesteros; **UCI Complejo Asistencial Universitario de Palencia (Palencia)**: **UCI Hospital Universitario Río Hortega (Valladolid)**: Virginia Fraile Gutiérrez , Jose Angel Berezo Garcia

#### **Ceuta**

**UCI Hospital Universitario de Ceuta**: Enrique Laza Laza

#### **Extremadura**

**UCI Hospital San Pedro de Alcántara (Cáceres)**: Elena Gallego Curto, M<sup>a</sup> Carmen Sánchez García; **UCI Hospital de Mérida(Mérida)**: Miguel Díaz-Tavora, Rosa Mancha

#### **Galicia:**

**UCI Hospital Montecelo (Pontevedra)**: Ana Ortega Montes, Isabel Gallego Barbachano, Eva Sanmartín Mantiñán. **UCI CHUAC A Coruña (A Coruña)**: María Lourdes Cordero, Raquel María

Rodríguez García, Jorge Gámez Zapata, María Gestal Vázquez. **UCI Centro Hospital Universitario de Ferrol (Ferrol)**: María José Castro Orjales, María Isabel Álvarez Diéguez. **UCI Hospitalario Clínico Universitario de Santiago (Santiago de Compostela)**: Carmen Rivero Velasco, Beatriz Lence Massa, Aitziber Santiago Langarica; **REA CHUAC A Coruña (A Coruña)**: María Gestal Vázquez. **UCI Hospital Lucus Augusti (Lugo)**: Ignacio Martínez Varela

#### **Huelva:**

**UCI Hospital Infanta Elena (Huelva)**: Diego Matallana Zapata,

#### **Madrid:**

**UCI IFEMA (Madrid)**: Alberto Hernández Tejedor; **UCI Hospital Príncipe de Asturias (Madrid)**: Esther M<sup>a</sup> López Ramos, Laura Alcázar Sánchez Elvira, Rocío Molina Montero, M<sup>a</sup> Consuelo Pintado Delgado, María Trascasa Muñoz de la Peña, Yaiza Betania Ortiz de Zárate Ansotegui, Alejandra Acha Aranda, Juan Higuera Lucas; **UCI Hospital de la Princesa (Madrid)**: Juan Antonio Sanchez Giralt, Marta Chicot Llano, Nuria Arevalillo Fernández, Marta Sánchez Galindo, Ricardo Andino Ruiz, Alfonso Canabal Berlanga; **UCI Hospital Clínico San Carlos (Madrid)**: Miguel Sánchez, Mercedes Nieto; **UCI Hospital HLA la Moncloa(Madrid)**:, Adoración Bueno Blázquez, Rosa María de la Casa, Fátima Martín Serrano , Samuel González López, Juan José Oñoro Cañaverál.

#### **Murcia**

**UCI Hospital Morales Meseguer (Murcia)**: Elena Martínez Quintana, Bernardo Gil Rueda, Áurea Higon Cañigral, Laura López Gómez , Pablo Safwat Bayoumi Delis, Augusto Montenegro Muore, Ángel Andrés Agamez Luengas; **UCI Hospital Clínico Universitario Virgen de la Arrixaca (Murcia)**: Enriqueta Andreu Soler, Ana Beatriz Pérez Pérez, José Higinio de Gea García, Rubén Jara Rubio, Silvia Sánchez Cámara, Alba Moreno Flores , José Moya Sánchez, Daniel Francisco Pérez Martínez,-M<sup>a</sup> Desamparados del Rey Carrión; **UCI Hospital Reina Sofía (Murcia)**: María José Rico Lledó, Juana María Serrano Navarro, Juan Francisco Martín Ruíz, Julián Triviño Hidalgo, África López Ferrer, Isabel Cremades Navalón; **UCI Hospital Santa Lucía (Cartagena)**: Josefa Murcia Payá, JM Alegre Gallego ; **UCI Hospital Rafael Méndez (Lorca)**:

María del Carmen Lorente, María García Valiente, Ana Burruezo López; **UCI Hospital Universitario Mar Menor (San Javier):** Marta Gonsalvez

#### **Navarra**

**UCI Hospital Reina Sofía (Tudela):** Ruth González Natera, Raquel Garrido López de Murillo, Tania Ojuel Gros, Raquel Flecha Viguera, Isabel López González; **UCI Hospital García Orcoyo (Estella-Lizarr):** Adriana García Herrera

#### **País Vasco**

**UCI Hospital Universitario de Donostia (Donostia):** Loreto Vidaur Tello, Maialen Aseguinolaza, Itziar Eguibar;

#### **Valencia:**

**UCI Hospital Universitario de La Ribera (Alzira):** Asunción Marqués Parra, Sergio García Marti, Alberto Lorenzo Aguilar, Laura Bellver Bosch, Victor Gascón Sanchez, Sonia De la Guía Ortega.

**UCI Hospital Dr. Peset (Valencia):** Martín Parejo Montell, Alberto Belenguer Muncharaz, Hector Hernández Garces, Victor Ramírez Montero, Mónica Crespo Gómez, Verónica Martí Algarra; **UCI**

**Hospital Universitari i Politècnic La Fe (Valencia):** Susana Sancho Chinesta, Joaquin Arguedas Cervera, Faustino Álvarez Cebrian, Begoña Balerdi Pérez, Rosa Jannone Fores, Javier Botella de Maglia; **UCI Hospital Clínico Universitario de Valencia (Valencia):** Nieves Carbonell

Monleón, Jose Ferreres Franco, Ainhoa Serrano Lazaro, Mar Juan Díaz, María Luisa Blasco

Cortés; **UCI Hospital Virgen de los Lirios de Alcoy (Alicante):** Laura Fayos, Julia Giménez,

Gaspar Soriano, Ricardo Navarro. **UCI Hospital Arnau de Vilanova (Valencia):** Sonia Mas,

Elena Bisbal, Laura Albert, Johncard Romero, Juan Fernández Cabreara; **UCI Hospital**

**Comarcal de Vinarós (Vinarós):** Andrea Ortíz

#### **Principado de Andorra**

**ICU Hospital Nostra Señora de Meritxell (Les Esclades):** Antonio Margarit Ribas, Neus Guasch

#### **Ireland**

**ICU St. James's Hospital (Dublin):** Ignacio Martín-Loeches, Sean Boyd
